# Supplementary material for: Quantitative Raman Spectroscopic Determination of the Composition, Pressure, and Density of CO2-CH4 Gas Mixtures
Source: Hindawi journal article supplement (doi:10.1155/2022/7238044), 2022-09-30
Supplement: f1 [file 7238044.f1.zip]

Archive with 4 entries (4 files):
- Supplemental Material.docx
- Table S1.docx
- Table S2.docx
- Table S3.docx
