# Supplementary material for: Quantitative Raman Spectroscopic Determination of the Composition, Pressure, and Density of CO2-CH4 Gas Mixtures
Source: Hindawi journal article supplement (doi:10.1155/2022/7238044), 2022-09-30
Supplement: f1 [file 7238044.f1.zip › Supplemental Material.docx]

# **Supplemental Material**

# Quantitative Raman spectroscopic determination of the composition, pressure, and density of CO2-CH4 gas mixtures

**Ying Chen1, 2, 3, I-Ming Chou2***

1 CAS Key Laboratory of Mineralogy and Metallogeny, and Guangdong Provincial Key Laboratory of Mineral Physics and Materials, Guangzhou Institute of Geochemistry, Chinese Academy of Sciences, Guangzhou 510640, China

2 CAS Key Laboratory for Experimental Study under Deep‐sea Extreme Conditions, Institute of Deep‐sea Science and Engineering, Chinese Academy of Sciences, Sanya 572000, China

3 University of Chinese Academy of Sciences, Beijing 100049, China

The Supplemental Material includes:

- **Tables S1 to S3**

Table S1. Calibrated Raman peak positions (cm-1) of the CH4 υ1 peakforpure CH4 gas and ten CO2-CH4 mixtures at room temperature (~24oC) and various pressures. The uncertainties were derived from the standard deviation of the three consecutive measurements of spectra at each *P*-*T* condition.

| *P* (MPa) | 10 mol% CH4 | 20 mol% CH4 | 30 mol% CH4 | 40 mol% CH4 | 50 mol% CH4 | 60 mol% CH4 | 70 mol% CH4 | 80 mol% CH4 | 85 mol% CH4 | 90 mol% CH4 | 100 mol% CH4 |
| --- | --- | --- | --- | --- | --- | --- | --- | --- | --- | --- | --- |
| 2 | 2917.64±0.00 | 2917.33±0.01 | 2917.19±0.02 | 2917.38±0.00 | 2917.46±0.00 | 2917.48±0.02 | 2917.54±0.00 | 2917.48±0.02 | 2917.29±0.00 | 2917.41±0.01 | 2917.56±0.00 |
| 5 | 2916.93±0.01 | 2916.65±0.00 | 2916.74±0.01 | 2916.83±0.01 | 2916.83±0.01 | 2916.81±0.00 | 2916.88±0.01 | 2916.71±0.00 | 2916.77±0.01 | 2916.80±0.01 | 2916.93±0.00 |
| 10 | 2913.08±0.01 | 2914.31±0.02 | 2914.70±0.02 | 2915.29±0.01 | 2915.57±0.03 | 2915.61±0.01 | 2915.71±0.01 | 2915.39±0.00 | 2915.65±0.00 | 2915.58±0.01 | 2915.84±0.01 |
| 20 | 2912.21±0.01 | 2912.42±0.00 | 2912.40±0.01 | 2912.88±0.00 | 2913.20±0.02 | 2913.18±0.00 | 2913.53±0.01 | 2913.41±0.01 | 2913.49±0.00 | 2913.53±0.01 | 2913.86±0.00 |
| 30 | 2912.11±0.00 | 2911.98±0.01 | 2911.90±0.02 | 2912.14±0.00 | 2912.05±0.00 | 2912.12±0.00 | 2912.45±0.01 | 2912.30±0.01 | 2912.35±0.01 | 2912.23±0.01 | 2912.63±0.01 |
| 40 | 2912.03±0.00 | 2911.72±0.01 | 2911.97±0.00 | 2911.64±0.01 | 2911.63±0.00 | 2911.63±0.01 | 2911.85±0.01 | 2911.62±0.00 | 2911.78±0.01 | 2911.65±0.01 | 2911.76±0.01 |

TableS2.Calibrated Raman peak positions (cm-1) of the lower and upper member of the CO2 Fermi diad and the Fermi diad splits (Δ) of pure CO2 gas and ten CO2-CH4 mixtures at room temperature (~24oC) and various pressures. The uncertainties were derived from the standard deviation of the three consecutive measurements of spectra at each *P*-*T* condition.

| *P* (MPa) | 10 mol% CO2 | 15 mol% CO2 | 20 mol% CO2 | 30 mol% CO2 | 40 mol% CO2 | 50 mol% CO2 | 60 mol% CO2 | 70 mol% CO2 | 80 mol% CO2 | 90 mol% CO2 | 100 mol% CO2 |
| --- | --- | --- | --- | --- | --- | --- | --- | --- | --- | --- | --- |
| 2 | 1285.55±0.01 | 1285.67±0.02 | 1285.67±0.01 | 1285.75±0.01 | 1285.70±0.01 | 1285.74±0.00 | 1285.64±0.02 | 1285.55±0.08 | 1285.65±0.01 | 1285.64±0.00 | 1285.61±0.00 |
| 5 | 1285.47±0.02 | 1285.35±0.01 | 1285.65±0.00 | 1285.39±0.01 | 1285.34±0.01 | 1285.32±0.01 | 1285.19±0.02 | 1285.20±0.01 | 1285.16±0.00 | 1285.04±0.01 | 1285.05±0.00 |
| 10 | 1284.80±0.01 | 1284.77±0.01 | 1284.74±0.01 | 1284.72±0.01 | 1284.59±0.00 | 1284.47±0.01 | 1284.19±0.01 | 1283.63±0.04 | 1283.23±0.01 | 1282.22±0.00 | 1281.74±0.00 |
| 20 | 1283.71±0.01 | 1283.63±0.01 | 1283.43±0.00 | 1283.47±0.00 | 1283.30±0.00 | 1283.20±0.01 | 1282.66±0.00 | 1281.90±0.00 | 1281.76±0.00 | 1281.30±0.01 | 1280.90±0.00 |
| 30 | 1282.94±0.01 | 1282.93±0.00 | 1282.83±0.00 | 1282.74±0.01 | 1282.42±0.01 | 1282.30±0.00 | 1281.92±0.00 | 1281.53±0.00 | 1281.33±0.01 | 1281.01±0.00 | 1280.63±0.01 |
| 40 | 1282.49±0.00 | 1282.45±0.01 | 1282.08±0.01 | 1282.30±0.00 | 1282.01±0.00 | 1281.86±0.01 | 1281.56±0.01 | 1281.16±0.00 | 1281.23±0.00 | 1280.78±0.01 | 1280.53±0.00 |
| 2 | 1388.27±0.00 | 1388.38±0.01 | 1388.39±0.02 | 1388.48±0.01 | 1388.43±0.01 | 1388.50±0.01 | 1388.41±0.00 | 1388.32±0.10 | 1388.44±0.01 | 1388.44±0.00 | 1388.41±0.00 |
| 5 | 1388.20±0.03 | 1388.10±0.02 | 1388.41±0.01 | 1388.17±0.01 | 1388.16±0.00 | 1388.15±0.01 | 1388.08±0.01 | 1388.13±0.01 | 1388.13±0.01 | 1388.07±0.00 | 1388.09±0.00 |
| 10 | 1387.59±0.00 | 1387.57±0.01 | 1387.58±0.00 | 1387.60±0.00 | 1387.56±0.00 | 1387.52±0.00 | 1387.37±0.00 | 1387.11±0.03 | 1386.87±0.00 | 1386.53±0.01 | 1386.38±0.00 |
| 20 | 1386.59±0.00 | 1386.57±0.01 | 1386.44±0.00 | 1386.56±0.00 | 1386.59±0.01 | 1386.63±0.01 | 1386.37±0.01 | 1386.03±0.00 | 1386.01±0.01 | 1385.94±0.01 | 1385.87±0.00 |
| 30 | 1385.90±0.02 | 1385.95±0.00 | 1385.96±0.01 | 1385.96±0.00 | 1385.90±0.00 | 1385.95±0.01 | 1385.84±0.01 | 1385.87±0.00 | 1385.77±0.00 | 1385.82±0.00 | 1385.77±0.05 |
| 40 | 1385.50±0.00 | 1385.55±0.00 | 1385.29±0.00 | 1385.63±0.00 | 1385.60±0.00 | 1385.62±0.01 | 1385.60±0.01 | 1385.62±0.00 | 1385.80±0.00 | 1385.72±0.00 | 1385.81±0.00 |
| 2 | 102.73±0.01 | 102.71±0.03 | 102.72±0.03 | 102.73±0.02 | 102.74±0.01 | 102.75±0.01 | 102.76±0.02 | 102.77±0.13 | 102.79±0.01 | 102.79±0.00 | 102.80±0.00 |
| 5 | 102.73±0.03 | 102.75±0.03 | 102.76±0.01 | 102.78±0.02 | 102.81±0.01 | 102.83±0.01 | 102.89±0.03 | 102.94±0.01 | 102.96±0.01 | 103.02±0.01 | 103.03±0.00 |
| 10 | 102.78±0.01 | 102.80±0.01 | 102.84±0.01 | 102.88±0.01 | 102.98±0.00 | 103.05±0.01 | 103.18±0.01 | 103.48±0.05 | 103.64±0.01 | 104.31±0.01 | 104.64±0.00 |
| 20 | 102.88±0.01 | 102.94±0.01 | 103.01±0.00 | 103.10±0.00 | 103.29±0.01 | 103.44±0.01 | 103.71±0.01 | 104.13±0.00 | 104.24±0.01 | 104.64±0.01 | 104.97±0.00 |
| 30 | 102.96±0.02 | 103.02±0.00 | 103.13±0.01 | 103.23±0.01 | 103.48±0.01 | 103.65±0.01 | 103.92±0.01 | 104.33±0.00 | 104.44±0.01 | 104.81±0.00 | 105.14±0.05 |
| 40 | 103.01±0.01 | 103.11±0.01 | 103.21±0.01 | 103.34±0.00 | 103.59±0.00 | 103.76±0.01 | 104.04±0.01 | 104.47±0.00 | 104.57±0.00 | 104.95±0.01 | 105.28±0.00 |

TableS3. Calibrated Raman peak positions (cm-1) of CH4 υ1 peakand Fermi diad splits (Δ) of CO2 forpure CH4 or CO2 gas and their five CO2-CH4 mixtures at various temperatures and pressures. The uncertainties were derived from the standard deviation of the three consecutive measurements of spectra at each *P*-*T* condition.

| *T*/oC | *P*/MPa | Δ/cm-1 | | | | | |  | υCH4/cm-1 | | | | | |
| --- | --- | --- | --- | --- | --- | --- | --- | --- | --- | --- | --- | --- | --- | --- |
| 10 mol%  CO2 | 30 mol%  CO2 | 50 mol% CO2 | 70 mol% CO2 | 90 mol% CO2 | 100 mol% CO2 |  | 10 mol%  CH4 | 30 mol%  CH4 | 50 mol%  CH4 | 70 mol%  CH4 | 90 mol%  CH4 | 100 mol%  CH4 |
| 24 | 2 | 102.73±0.01 | 102.73±0.02 | 102.75±0.01 | 102.77±0.13 | 102.79±0.00 | 102.80±0.00 |  | 2917.64±0.00 | 2917.19±0.02 | 2917.46±0.00 | 2917.54±0.00 | 2917.41±0.01 | 2917.56±0.00 |
| 24 | 5 | 102.73±0.03 | 102.78±0.02 | 102.83±0.01 | 102.94±0.01 | 103.02±0.01 | 103.03±0.00 |  | 2916.93±0.01 | 2916.74±0.01 | 2916.83±0.01 | 2916.88±0.01 | 2916.80±0.01 | 2916.93±0.00 |
| 24 | 10 | 102.78±0.01 | 102.88±0.01 | 103.05±0.01 | 103.48±0.05 | 104.31±0.01 | 104.64±0.00 |  | 2913.08±0.01 | 2914.70±0.02 | 2915.57±0.03 | 2915.71±0.01 | 2915.58±0.01 | 2915.84±0.01 |
| 24 | 20 | 102.88±0.01 | 103.10±0.00 | 103.44±0.01 | 104.13±0.00 | 104.64±0.01 | 104.97±0.00 |  | 2912.21±0.01 | 2912.40±0.01 | 2913.20±0.02 | 2913.53±0.01 | 2913.53±0.01 | 2913.86±0.00 |
| 24 | 30 | 102.96±0.02 | 103.23±0.01 | 103.65±0.01 | 104.33±0.00 | 104.81±0.00 | 105.14±0.05 |  | 2912.11±0.00 | 2911.90±0.02 | 2912.05±0.00 | 2912.45±0.01 | 2912.23±0.01 | 2912.63±0.01 |
| 24 | 40 | 103.01±0.01 | 103.34±0.00 | 103.76±0.01 | 104.47±0.00 | 104.95±0.01 | 105.29±0.00 |  | 2912.03±0.00 | 2911.97±0.00 | 2911.63±0.00 | 2911.85±0.01 | 2911.65±0.01 | 2911.76±0.01 |
| 100 | 2 | 102.66±0.01 | 102.69±0.01 | 102.67±0.011 | 102.72±0.00 | 102.73±0.00 | 102.73±0.01 |  | 2917.40±0.00 | 2917.44±0.00 | 2917.61±0.01 | 2917.28±0.02 | 2917.57±0.01 | 2917.91±0.01 |
| 100 | 5 | 102.70±0.01 | 102.71±0.00 | 102.72±0.00 | 102.82±0.00 | 102.84±0.00 | 102.85±0.00 |  | 2917.04±0.00 | 2917.00±0.03 | 2917.20±0.011 | 2917.23±0.00 | 2917.16±0.00 | 2917.51±0.01 |
| 100 | 10 | 102.72±0.00 | 102.78±0.01 | 102.81±0.00 | 102.98±0.01 | 103.06±0.00 | 103.07±0.00 |  | 2916.29±0.00 | 2916.62±0.00 | 2916.43±0.02 | 2916.53±0.00 | 2916.36±0.00 | 2916.81±0.01 |
| 100 | 20 | 102.77±0.01 | 102.91±0.00 | 103.02±0.00 | 103.34±0.01 | 103.59±0.00 | 103.63±0.01 |  | 2914.46±0.06 | 2915.05±0.00 | 2915.02±0.00 | 2915.16±0.01 | 2915.01±0.00 | 2915.52±0.00 |
| 100 | 30 | 102.83±0.00 | 103.00±0.00 | 103.21±0.01 | 103.63±0.00 | 103.96±0.00 | 104.01±0.00 |  | 2913.59±0.01 | 2913.99±0.00 | 2913.98±0.01 | 2914.10±0.00 | 2914.00±0.01 | 2914.49±0.00 |
| 100 | 40 | 102.88±0.00 | 103.08±0.00 | 103.44±0.01 | 103.84±0.00 | 104.18±0.00 | 104.23±0.00 |  | 2913.38±0.01 | 2913.45±0.01 | 2913.15±0.01 | 2913.40±0.00 | 2913.23±0.00 | 2913.77±0.00 |
| 150 | 2 | 102.64±0.02 | 102.67±0.01 | 102.65±0.00 | 102.70±0.01 | 102.71±0.00 | 102.71±0.01 |  | 2917.65±0.03 | 2917.52±0.00 | 2917.52±0.01 | 2917.71±0.00 | 2917.63±0.00 | 2917.99±0.01 |
| 150 | 5 | 102.66±0.01 | 102.70±0.01 | 102.69±0.00 | 102.76±0.01 | 102.79±0.00 | 102.79±0.00 |  | 2917.53±0.01 | 2917.26±0.00 | 2917.46±0.03 | 2917.36±0.00 | 2917.30±0.01 | 2917.63±0.02 |
| 150 | 10 | 102.70±0.00 | 102.74±0.01 | 102.76±0.00 | 102.87±0.00 | 102.93±0.00 | 102.94±0.00 |  | 2917.01±0.00 | 2916.69±0.00 | 2916.67±0.00 | 2916.76±0.01 | 2916.68±0.01 | 2917.08±0.00 |
| 150 | 20 | 102.75±0.00 | 102.82±0.01 | 102.91±0.00 | 103.11±0.00 | 103.23±0.00 | 103.27±0.01 |  | 2915.95±0.00 | 2915.59±0.00 | 2915.49±0.01 | 2915.69±0.00 | 2915.59±0.01 | 2915.98±0.00 |
| 150 | 30 | 102.78±0.00 | 102.90±0.00 | 103.04±0.01 | 103.35±0.00 | 103.56±0.00 | 103.60±0.00 |  | 2914.52±0.00 | 2914.71±0.00 | 2914.51±0.01 | 2914.76±0.01 | 2914.69±0.00 | 2915.10±0.01 |
| 150 | 40 | 102.82±0.01 | 102.98±0.01 | 103.16±0.01 | 103.52±0.00 | 103.78±0.00 | 103.82±0.00 |  | 2913.97±0.00 | 2913.96±0.01 | 2913.91±0.01 | 2914.20±0.00 | 2913.97±0.01 | 2914.39±0.00 |
| 200 | 2 | 102.64±0.04 | 102.65±0.00 | 102.63±0.02 | 102.68±0.01 | 102.69±0.01 | 102.68±0.01 |  | 2917.67±0.01 | 2917.74±0.00 | 2917.68±0.00 | 2917.53±0.00 | 2917.55±0.01 | 2917.96±0.01 |
| 200 | 5 | 102.67±0.02 | 102.66±0.01 | 102.66±0.01 | 102.72±0.00 | 102.74±0.01 | 102.75±0.00 |  | 2917.43±0.02 | 2917.42±0.00 | 2917.46±0.00 | 2917.24±0.00 | 2917.35±0.01 | 2917.69±0.02 |
| 200 | 10 | 102.68±0.00 | 102.70±0.011 | 102.68±0.02 | 102.81±0.00 | 102.85±0.00 | 102.86±0.00 |  | 2916.98±0.00 | 2916.98±0.01 | 2916.77±0.00 | 2916.75±0.00 | 2916.84±0.00 | 2917.22±0.00 |
| 200 | 20 | 102.71±0.01 | 102.78±0.00 | 102.83±0.00 | 102.99±0.01 | 103.08±0.00 | 103.10±0.00 |  | 2916.07±0.00 | 2916.08±0.01 | 2915.84±0.00 | 2915.84±0.02 | 2915.95±0.00 | 2916.33±0.00 |
| 200 | 30 | 102.75±0.01 | 102.84±0.00 | 102.95±0.00 | 103.17±0.01 | 103.31±0.01 | 103.32±0.00 |  | 2915.18±0.00 | 2915.32±0.00 | 2915.04±0.01 | 2915.03±0.00 | 2915.34±0.02 | 2915.57±0.01 |
| 200 | 40 | 102.79±0.00 | 102.91±0.01 | 103.03±0.00 | 103.33±0.00 | 103.50±0.00 | 103.53±0.01 |  | 2914.63±0.01 | 2914.70±0.00 | 2914.43±0.01 | 2914.37±0.01 | 2914.71±0.03 | 2914.92±0.00 |
| 250 | 2 | 102.63±0.06 | 102.64±0.00 | 102.61±0.01 | 102.66±0.00 | 102.67±0.00 | 102.66±0.00 |  | 2917.61±0.02 | 2917.83±0.00 | 2917.71±0.06 | 2917.42±0.01 | 2917.68±0.00 | 2917.99±0.02 |
| 250 | 5 | 102.65±0.05 | 102.64±0.00 | 102.63±0.00 | 102.69±0.00 | 102.71±0.01 | 102.72±0.00 |  | 2917.40±0.00 | 2917.49±0.01 | 2917.43±0.01 | 2917.22±0.01 | 2917.47±0.01 | 2917.73±0.00 |
| 250 | 10 | 102.67±0.01 | 102.69±0.00 | 102.68±0.01 | 102.76±0.00 | 102.79±0.00 | 102.80±0.01 |  | 2916.71±0.01 | 2916.98±0.00 | 2916.93±0.01 | 2916.93±0.00 | 2916.94±0.00 | 2917.31±0.00 |
| 250 | 20 | 102.71±0.00 | 102.74±0.00 | 102.78±0.00 | 102.91±0.00 | 102.97±0.00 | 102.98±0.00 |  | 2915.97±0.00 | 2916.40±0.00 | 2916.13±0.01 | 2916.13±0.00 | 2916.09±0.00 | 2916.52±0.00 |
| 250 | 30 | 102.73±0.01 | 102.80±0.00 | 102.84±0.00 | 103.05±0.00 | 103.16±0.00 | 103.16±0.01 |  | 2915.36±0.00 | 2915.61±0.03 | 2915.36±0.00 | 2915.43±0.01 | 2915.33±0.02 | 2915.87±0.00 |
| 250 | 40 | 102.80±0.00 | 102.85±0.01 | 102.98±0.00 | 103.17±0.00 | 103.32±0.01 | 103.34±0.01 |  | 2914.82±0.00 | 2915.34±0.01 | 2914.80±0.01 | 2914.84±0.00 | 2914.73±0.01 | 2915.27±0.01 |
| 300 | 2 | 102.59±0.02 | 102.61±0.01 | 102.62±0.00 | 102.65±0.00 | 102.63±0.02 | 102.65±0.01 |  | 2917.74±0.00 | 2917.47±0.00 | 2917.63±0.01 | 2917.67±0.01 | 2917.59±0.01 | 2918.14±0.00 |
| 300 | 5 | 102.60±0.01 | 102.62±0.00 | 102.64±0.00 | 102.68±0.00 | 102.68±0.01 | 102.69±0.00 |  | 2917.54±0.00 | 2917.28±0.00 | 2917.41±0.01 | 2917.66±0.00 | 2917.39±0.00 | 2917.93±0.01 |
| 300 | 10 | 102.61±0.00 | 102.62±0.05 | 102.69±0.00 | 102.73±0.00 | 102.74±0.01 | 102.77±0.00 |  | 2917.19±0.01 | 2916.94±0.00 | 2916.84±0.00 | 2917.25±0.01 | 2917.13±0.01 | 2917.57±0.00 |
| 300 | 20 | 102.64±0.00 | 102.71±0.00 | 102.76±0.00 | 102.85±0.00 | 102.87±0.00 | 102.91±0.00 |  | 2916.42±0.00 | 2916.30±0.00 | 2916.19±0.01 | 2916.48±0.011 | 2916.44±0.01 | 2916.72±0.01 |
| 300 | 30 | 102.67±0.01 | 102.76±0.00 | 102.84±0.01 | 102.97±0.00 | 103.01±0.01 | 103.05±0.00 |  | 2915.69±0.02 | 2915.99±0.01 | 2915.64±0.01 | 2915.86±0.01 | 2915.92±0.01 | 2916.11±0.00 |
| 300 | 40 | 102.72±0.00 | 102.81±0.00 | 102.91±0.00 | 103.08±0.00 | 103.19±0.00 | 103.20±0.00 |  | 2914.91±0.01 | 2915.69±0.03 | 2915.15±0.00 | 2915.28±0.00 | 2915.24±0.00 | 2915.61±0.01 |
