# Supplementary material for: Quantitative Raman Spectroscopic Determination of the Composition, Pressure, and Density of CO2-CH4 Gas Mixtures
Source: Hindawi journal article supplement (doi:10.1155/2022/7238044), 2022-09-30
Supplement: f1 [file 7238044.f1.zip › Table S1.docx]

Table S1. Calibrated Raman peak positions (cm-1) of the CH4 υ1 peakforpure CH4 gas and ten CO2-CH4 mixtures at room temperature (~24oC) and various pressures. The uncertainties were derived from the standard deviation of the three consecutive measurements of spectra at each *P*-*T* condition.

| *P* (MPa) | 10 mol% CH4 | 20 mol% CH4 | 30 mol% CH4 | 40 mol% CH4 | 50 mol% CH4 | 60 mol% CH4 | 70 mol% CH4 | 80 mol% CH4 | 85 mol% CH4 | 90 mol% CH4 | 100 mol% CH4 |
| --- | --- | --- | --- | --- | --- | --- | --- | --- | --- | --- | --- |
| 2 | 2917.64±0.00 | 2917.33±0.01 | 2917.19±0.02 | 2917.38±0.00 | 2917.46±0.00 | 2917.48±0.02 | 2917.54±0.00 | 2917.48±0.02 | 2917.29±0.00 | 2917.41±0.01 | 2917.56±0.00 |
| 5 | 2916.93±0.01 | 2916.65±0.00 | 2916.74±0.01 | 2916.83±0.01 | 2916.83±0.01 | 2916.81±0.00 | 2916.88±0.01 | 2916.71±0.00 | 2916.77±0.01 | 2916.80±0.01 | 2916.93±0.00 |
| 10 | 2913.08±0.01 | 2914.31±0.02 | 2914.70±0.02 | 2915.29±0.01 | 2915.57±0.03 | 2915.61±0.01 | 2915.71±0.01 | 2915.39±0.00 | 2915.65±0.00 | 2915.58±0.01 | 2915.84±0.01 |
| 20 | 2912.21±0.01 | 2912.42±0.00 | 2912.40±0.01 | 2912.88±0.00 | 2913.20±0.02 | 2913.18±0.00 | 2913.53±0.01 | 2913.41±0.01 | 2913.49±0.00 | 2913.53±0.01 | 2913.86±0.00 |
| 30 | 2912.11±0.00 | 2911.98±0.01 | 2911.90±0.02 | 2912.14±0.00 | 2912.05±0.00 | 2912.12±0.00 | 2912.45±0.01 | 2912.30±0.01 | 2912.35±0.01 | 2912.23±0.01 | 2912.63±0.01 |
| 40 | 2912.03±0.00 | 2911.72±0.01 | 2911.97±0.00 | 2911.64±0.01 | 2911.63±0.00 | 2911.63±0.01 | 2911.85±0.01 | 2911.62±0.00 | 2911.78±0.01 | 2911.65±0.01 | 2911.76±0.01 |
