# Supplementary material for: Quantitative Raman Spectroscopic Determination of the Composition, Pressure, and Density of CO2-CH4 Gas Mixtures
Source: Hindawi journal article supplement (doi:10.1155/2022/7238044), 2022-09-30
Supplement: f1 [file 7238044.f1.zip › Table S2.docx]

TableS2.Calibrated Raman peak positions (cm-1) of the lower and upper member of the CO2 Fermi diad and the Fermi diad splits (Δ) of pure CO2 gas and ten CO2-CH4 mixtures at room temperature (~24oC) and various pressures. The uncertainties were derived from the standard deviation of the three consecutive measurements of spectra at each *P*-*T* condition.

| *P* (MPa) | 10 mol% CO2 | 15 mol% CO2 | 20 mol% CO2 | 30 mol% CO2 | 40 mol% CO2 | 50 mol% CO2 | 60 mol% CO2 | 70 mol% CO2 | 80 mol% CO2 | 90 mol% CO2 | 100 mol% CO2 |
| --- | --- | --- | --- | --- | --- | --- | --- | --- | --- | --- | --- |
| 2 | 1285.55±0.01 | 1285.67±0.02 | 1285.67±0.01 | 1285.75±0.01 | 1285.70±0.01 | 1285.74±0.00 | 1285.64±0.02 | 1285.55±0.08 | 1285.65±0.01 | 1285.64±0.00 | 1285.61±0.00 |
| 5 | 1285.47±0.02 | 1285.35±0.01 | 1285.65±0.00 | 1285.39±0.01 | 1285.34±0.01 | 1285.32±0.01 | 1285.19±0.02 | 1285.20±0.01 | 1285.16±0.00 | 1285.04±0.01 | 1285.05±0.00 |
| 10 | 1284.80±0.01 | 1284.77±0.01 | 1284.74±0.01 | 1284.72±0.01 | 1284.59±0.00 | 1284.47±0.01 | 1284.19±0.01 | 1283.63±0.04 | 1283.23±0.01 | 1282.22±0.00 | 1281.74±0.00 |
| 20 | 1283.71±0.01 | 1283.63±0.01 | 1283.43±0.00 | 1283.47±0.00 | 1283.30±0.00 | 1283.20±0.01 | 1282.66±0.00 | 1281.90±0.00 | 1281.76±0.00 | 1281.30±0.01 | 1280.90±0.00 |
| 30 | 1282.94±0.01 | 1282.93±0.00 | 1282.83±0.00 | 1282.74±0.01 | 1282.42±0.01 | 1282.30±0.00 | 1281.92±0.00 | 1281.53±0.00 | 1281.33±0.01 | 1281.01±0.00 | 1280.63±0.01 |
| 40 | 1282.49±0.00 | 1282.45±0.01 | 1282.08±0.01 | 1282.30±0.00 | 1282.01±0.00 | 1281.86±0.01 | 1281.56±0.01 | 1281.16±0.00 | 1281.23±0.00 | 1280.78±0.01 | 1280.53±0.00 |
| 2 | 1388.27±0.00 | 1388.38±0.01 | 1388.39±0.02 | 1388.48±0.01 | 1388.43±0.01 | 1388.50±0.01 | 1388.41±0.00 | 1388.32±0.10 | 1388.44±0.01 | 1388.44±0.00 | 1388.41±0.00 |
| 5 | 1388.20±0.03 | 1388.10±0.02 | 1388.41±0.01 | 1388.17±0.01 | 1388.16±0.00 | 1388.15±0.01 | 1388.08±0.01 | 1388.13±0.01 | 1388.13±0.01 | 1388.07±0.00 | 1388.09±0.00 |
| 10 | 1387.59±0.00 | 1387.57±0.01 | 1387.58±0.00 | 1387.60±0.00 | 1387.56±0.00 | 1387.52±0.00 | 1387.37±0.00 | 1387.11±0.03 | 1386.87±0.00 | 1386.53±0.01 | 1386.38±0.00 |
| 20 | 1386.59±0.00 | 1386.57±0.01 | 1386.44±0.00 | 1386.56±0.00 | 1386.59±0.01 | 1386.63±0.01 | 1386.37±0.01 | 1386.03±0.00 | 1386.01±0.01 | 1385.94±0.01 | 1385.87±0.00 |
| 30 | 1385.90±0.02 | 1385.95±0.00 | 1385.96±0.01 | 1385.96±0.00 | 1385.90±0.00 | 1385.95±0.01 | 1385.84±0.01 | 1385.87±0.00 | 1385.77±0.00 | 1385.82±0.00 | 1385.77±0.05 |
| 40 | 1385.50±0.00 | 1385.55±0.00 | 1385.29±0.00 | 1385.63±0.00 | 1385.60±0.00 | 1385.62±0.01 | 1385.60±0.01 | 1385.62±0.00 | 1385.80±0.00 | 1385.72±0.00 | 1385.81±0.00 |
| 2 | 102.73±0.01 | 102.71±0.03 | 102.72±0.03 | 102.73±0.02 | 102.74±0.01 | 102.75±0.01 | 102.76±0.02 | 102.77±0.13 | 102.79±0.01 | 102.79±0.00 | 102.80±0.00 |
| 5 | 102.73±0.03 | 102.75±0.03 | 102.76±0.01 | 102.78±0.02 | 102.81±0.01 | 102.83±0.01 | 102.89±0.03 | 102.94±0.01 | 102.96±0.01 | 103.02±0.01 | 103.03±0.00 |
| 10 | 102.78±0.01 | 102.80±0.01 | 102.84±0.01 | 102.88±0.01 | 102.98±0.00 | 103.05±0.01 | 103.18±0.01 | 103.48±0.05 | 103.64±0.01 | 104.31±0.01 | 104.64±0.00 |
| 20 | 102.88±0.01 | 102.94±0.01 | 103.01±0.00 | 103.10±0.00 | 103.29±0.01 | 103.44±0.01 | 103.71±0.01 | 104.13±0.00 | 104.24±0.01 | 104.64±0.01 | 104.97±0.00 |
| 30 | 102.96±0.02 | 103.02±0.00 | 103.13±0.01 | 103.23±0.01 | 103.48±0.01 | 103.65±0.01 | 103.92±0.01 | 104.33±0.00 | 104.44±0.01 | 104.81±0.00 | 105.14±0.05 |
| 40 | 103.01±0.01 | 103.11±0.01 | 103.21±0.01 | 103.34±0.00 | 103.59±0.00 | 103.76±0.01 | 104.04±0.01 | 104.47±0.00 | 104.57±0.00 | 104.95±0.01 | 105.28±0.00 |
